# Supplementary material for: Efficacy of a Web-Based Intervention for Depressive Disorders: Three-Arm Randomized Controlled Trial Comparing Guided and Unguided Self-Help With Waitlist Control
Source: PubMed Central journal article supplement (PMC9016501; doi:10.2196/34330), 2022-04-04
Supplement: formative_v6i4e34330_app2.pdf [file formative_v6i4e34330_app2.pdf]

**Appendix 2.** Diagnoses according to Mini International Neuropsychiatric Interview (MINI).

| Diagnosis                          | Guided group<br>( <i>N</i> = 151) |      | Unguided group<br>( <i>N</i> = 150) |      | Control group<br>( <i>N</i> = 100) |      | Total<br>( <i>N</i> = 401) |      |
|------------------------------------|-----------------------------------|------|-------------------------------------|------|------------------------------------|------|----------------------------|------|
|                                    | <i>N</i>                          | %    | <i>N</i>                            | %    | <i>N</i>                           | %    | <i>N</i>                   | %    |
| Major depressive episode, current  | 143                               | 94.7 | 132                                 | 88.0 | 78                                 | 78.0 | 353                        | 88.0 |
| Major depressive episode, lifetime | 94                                | 62.3 | 103                                 | 68.7 | 63                                 | 63.0 | 260                        | 64.8 |
| Dysthymia                          | 9                                 | 6.0  | 20                                  | 13.3 | 24                                 | 24.0 | 53                         | 13.2 |
| Suicidality                        | 16                                | 10.6 | 10                                  | 6.7  | 3                                  | 3.0  | 29                         | 7.2  |
| Mania/hypomania, current           | 0                                 | 0.0  | 0                                   | 0.0  | 0                                  | 0.0  | 0                          | 0.0  |
| Mania/hypomania, lifetime          | 0                                 | 0.0  | 0                                   | 0.0  | 0                                  | 0.0  | 0                          | 0.0  |
| Panic disorder, current            | 39                                | 25.8 | 24                                  | 16.0 | 9                                  | 9.0  | 72                         | 18.0 |
| Panic disorder, lifetime           | 88                                | 58.3 | 60                                  | 40.0 | 29                                 | 29.0 | 177                        | 44.1 |
| Panic disorder without agoraphobia | 19                                | 12.6 | 12                                  | 8.0  | 7                                  | 7.0  | 38                         | 9.5  |
| Panic disorder with agoraphobia    | 26                                | 17.2 | 18                                  | 12.0 | 4                                  | 4.0  | 48                         | 12.0 |
| Social anxiety disorder            | 23                                | 15.2 | 20                                  | 13.3 | 9                                  | 9.0  | 52                         | 13.0 |
| Obsessive–compulsive disorder      | 57                                | 37.7 | 58                                  | 38.7 | 32                                 | 32.0 | 147                        | 36.7 |
| Post-traumatic stress disorder     | 9                                 | 6.0  | 7                                   | 4.7  | 8                                  | 8.0  | 24                         | 6.0  |
| Alcohol dependence                 | 17                                | 11.3 | 18                                  | 12.0 | 10                                 | 10.0 | 45                         | 11.2 |
| Alcohol abuse                      | 0                                 | 0.0  | 0                                   | 0.0  | 0                                  | 0.0  | 0                          | 0.0  |
| Drug dependence                    | 1                                 | 0.7  | 0                                   | 0.0  | 4                                  | 4.0  | 5                          | 1.2  |
| Drug abuse                         | 0                                 | 0.0  | 0                                   | 0.0  | 0                                  | 0.0  | 0                          | 0.0  |
| Psychotic disorder, current        | 0                                 | 0.0  | 0                                   | 0.0  | 1                                  | 1.0  | 1                          | 0.2  |
| Psychotic disorder, lifetime       | 0                                 | 0.0  | 0                                   | 0.0  | 0                                  | 0.0  | 0                          | 0.0  |
| Anorexia nervosa                   | 0                                 | 0.0  | 0                                   | 0.0  | 0                                  | 0.0  | 0                          | 0.0  |
| Bulimia nervosa                    | 0                                 | 0.0  | 2                                   | 1.3  | 1                                  | 1.0  | 3                          | 0.7  |
| Binge eating disorder              | 10                                | 6.6  | 14                                  | 9.3  | 9                                  | 9.0  | 33                         | 8.2  |
| Generalized anxiety disorder       | 4                                 | 2.6  | 0                                   | 0.0  | 1                                  | 1.0  | 5                          | 1.2  |
