# Supplementary material for: Efficacy of a Web-Based Intervention for Depressive Disorders: Three-Arm Randomized Controlled Trial Comparing Guided and Unguided Self-Help With Waitlist Control
Source: PubMed Central journal article supplement (PMC9016501; doi:10.2196/34330), 2022-04-04
Supplement: formative_v6i4e34330_app3.pdf [file formative_v6i4e34330_app3.pdf]

**Appendix 3.** Intervention usage data for the guided and unguided group.

| Usage parameter                                 | Guided<br>(N = 151) |       | Unguided<br>(N = 150) |       | Total sample<br>(N = 301) |       |
|-------------------------------------------------|---------------------|-------|-----------------------|-------|---------------------------|-------|
|                                                 | M                   | SD    | M                     | SD    | M                         | SD    |
| module progress                                 | 9.4                 | 2.3   | 9.3                   | 2.4   | 9.4                       | 2.3   |
| Main course completion rate <sup>a</sup> , N, % | 130                 | 86.1% | 124                   | 83.2% | 254                       | 84.4% |

Notes. <sup>a</sup> Course completion of 6 core modules completed.
