# Supplementary material for: Efficacy of a Web-Based Intervention for Depressive Disorders: Three-Arm Randomized Controlled Trial Comparing Guided and Unguided Self-Help With Waitlist Control
Source: PubMed Central journal article supplement (PMC9016501; doi:10.2196/34330), 2022-04-04
Supplement: formative_v6i4e34330_app4.pdf [file formative_v6i4e34330_app4.pdf]

#### **Appendix 4. Completer Analysis.**

##### *Primary Outcome*

With regard to the primary outcome measure (BDI-II, completer sample), repeated-measures ANOVA revealed a significant main effect of time ( $F_{(3,453)}=160.83, P<.001, \eta^2=0.18$ ). Moreover, a significant interaction effect of group  $\times$  time ( $F_{(6,453)}=32.11, P<.001, \eta^2=0.12$ ) was found.

*Post hoc* follow-up analysis with the Bonferroni correction was conducted to establish significant differences between groups. Significant differences were found between the guided group and control group ( $P<.001$ ) and the unguided group and control group ( $P<.001$ ). No significant difference was found between the guided group and unguided group ( $P=1.0$ ).

Effect sizes (Cohen's  $d$ ) for the BDI-II completer outcome for all groups are reported in Table 3.

Response, defined as the percentage of participants that had a reduction of depressive symptoms (BDI-II) by 50% or more at posttreatment (T3) was reached by 139 (46.2%) of all 301 completers. 55.3% ( $n=73$  out of 132) in the guided group, 55.2% ( $n=64$  out of 116) in the unguided group, and 3.8% ( $n=2$  out of 53) in the control group.

Remission, defined as a BDI-II score of 10 or less at posttreatment in the completer sample was reached by 81 (26.9%) of all 301 completers. 35.6% ( $n=47$  out of 132) in the guided group, 29.3% ( $n=34$  out of 116) in the unguided group. No participant in the control group reached remission.

##### *Secondary Outcomes*

Repeated-measures ANOVAs showed a significant interaction effect (group  $\times$  time) between pre-treatment and post-treatment for QIDS-SR-16 and BAI measurements in the completer sample (QIDS-SR-16,  $F_{(6,456)}=18.63, P<.001, \eta^2=0.15$ ; BAI,  $F_{(4,564)}=22.22, P<.001, \eta^2=0.09$ ).

Also, a significant main effect for the factor time was found (QIDS-SR-16,  $F_{(3,456)}=65.76, P<.001, \eta^2=0.24$ ; BAI,  $F_{(2,564)}=72.23, P<.001, \eta^2=0.15$ ).

The HRSD-24 ( $F_{(4,38)}=2.54, P<.056, \eta^2=0.16$ ) showed no significant interaction effect (group  $\times$  time) between pre-treatment and post-treatment in the completer sample. Also, no significant main effect for the factor time was found (HRSD-24,  $F_{(2,38)}=2.12, P=.13, \eta^2=0.07$ ).

Moreover, Bonferroni *post hoc* pairwise comparisons were conducted to reveal significant group differences for each outcome parameter.

A Bonferroni *post hoc* analysis of the QIDS-SR-16 scores was conducted and identified significant differences between both intervention groups and the control group (guided group and control group:

( $P < .001$ ); unguided group and control group:  $P < .001$ ). Moreover, no significant difference was found between the guided group and unguided group ( $P = 1.0$ ).

Also, explorative Bonferroni *post hoc* analysis of the HRSD-24 scores demonstrated a significant difference between both intervention groups and control group (guided group and control group:  $P < .001$ ; unguided group and control group:  $P < .001$ ), with no significant difference between the guided group and unguided group ( $P = 1.0$ ).

Also, Bonferroni *post hoc* analysis of the BAI scores demonstrated a significant difference between both intervention groups and control group (guided group and control group:  $P < .001$ ; unguided group and control group:  $P < .001$ ), with no significant difference between the guided group and unguided group ( $P = .37$ ).

Effect sizes (Cohen's *d*) for all secondary measurements for completer outcome for all groups are reported in Table 3.
